# Supplementary material for: Transcriptional landscape of PTEN loss in primary prostate cancer
Source: BMC Cancer. 2021 Jul 26;21:856. doi: 10.1186/s12885-021-08593-y (PMC8314517; doi:10.1186/s12885-021-08593-y)
Supplement: Supplementary file 1 — Additional file 1: Supplementary Tables. Excel spreadsheet containing the raw results of all bioinformatics analysis. [file 12885_2021_8593_MOESM1_ESM.xlsx]

## Sheet: S1_BHM_signature
X1

## Sheet: S2_BHM_signature_ERGfusion
X1

## Sheet: S3_TCGA_signature
geneID

## Sheet: S4_TCGA_signature_ERGintact
geneID

## Sheet: S5_TCGA_signature_ERGfusion
geneID

## Sheet: S6_BP_TCGA_ERGintact
pathway

## Sheet: S7_BP_TCGA_ERGfusion
pathway

## Sheet: S8_BP_TCGA_overall
pathway

## Sheet: S9_BP_BHM_ERGfusion
pathway

## Sheet: S10_BP_BHM_overall
pathway

[truncated: 10 more sheets: S11_hallmarks_TCGA_ERGintact, S12_hallmarks_TCGA_ERGfusion, S13_hallmarks_TCGA_overall, S14_hallmarks_BHM_ERGfusion, S15_hallmarks_BHM_overall, S16_reactome_TCGA_ERGintact, S17_reactome_TCGA_ERGfusion, S18_reactome_TCGA_overall, S19_reactome_BHM_ERGfusion, S20_reactome_BHM_overall]
